1 **Purifying and balancing selection on embryonic semi-lethal haplotypes**  
2 **in a wild mammal.**

3  
4  
5  
6

7 Authors names and addresses:

8

9 Stoffel, M.A.<sup>1\*</sup>, Johnston, S.E.<sup>1</sup>, Pilkington, J.G.<sup>1</sup>, Pemberton, J.M.<sup>1</sup>

10 <sup>1</sup>Institute of Ecology and Evolution, School of Biological Sciences, University of Edinburgh,  
11 Edinburgh, EH9 3FL, United Kingdom

12  
13  
14  
15  
16  
17  
18  
19

20 Key words:

21 deleterious variation, inbreeding depression, fitness, antagonistic pleiotropy

22

23 Short running title:

24 Embryonic semi-lethal mutations in wild sheep

25

26 \* Corresponding author:

27 Martin A. Stoffel

28 Postal address: Institute of Ecology and Evolution, University of Edinburgh, Edinburgh, EH9 3FL, UK

29

30 E-mail: martin.stoffel@ed.ac.uk

31 **Abstract**

32 Embryonic lethal mutations are arguably the earliest and most severe manifestation of inbreeding  
33 depression, but their impact on wild populations is not well understood. Here, we combined  
34 genomic, fitness and life-history data from 5,925 wild Soay sheep sampled over nearly three decades  
35 to explore the impact of embryonic lethal mutations and their evolutionary dynamics. We searched  
36 for haplotypes which in their homozygous state are unusually rare in the offspring of known carrier  
37 parents and found three putatively semi-lethal haplotypes with 27-46% fewer homozygous offspring  
38 than expected. Two of these haplotypes are decreasing in frequency, and gene-dropping  
39 simulations through the pedigree suggest that this is partially due to purifying selection. In contrast,  
40 the frequency of the third semi-lethal haplotype remains relatively stable over time. We show that  
41 the haplotype could be maintained by balancing selection because it is also associated with  
42 increased postnatal survival and body weight and because its cumulative frequency change is lower  
43 than in most drift-only simulations. Our study highlights embryonic mutations as a largely neglected  
44 contributor to inbreeding depression and provides a rare example of how harmful genetic variation  
45 can be maintained through balancing selection in a wild mammal population.

## 46 **Introduction**

47 Most organisms carry a large number of (partially-) recessive deleterious mutations spread  
48 throughout their genomes (Charlesworth & Willis, 2009). While their effects are often concealed as  
49 heterozygotes, inbreeding increases genome-wide homozygosity and allows harmful alleles to be  
50 expressed. This causes a reduction in fitness in the offspring of related parents, a phenomenon  
51 termed inbreeding depression (Charlesworth & Willis, 2009). Inbreeding depression in wild  
52 populations has mostly been measured on a genome-wide scale, so that little is known about the  
53 effect sizes and location of loci involved (Kardos *et al.*, 2016). For small populations, theory predicts  
54 that strongly deleterious recessive mutations are rapidly purged because they are often exposed to  
55 selection as homozygotes (Hedrick & Garcia-Dorado, 2016). In line with this, recent whole-genome  
56 sequencing studies frequently show purging of predicted loss-of-function mutations in small or  
57 bottlenecked populations (Xue *et al.*, 2015; Grossen *et al.*, 2020; Khan *et al.*, 2021). However, large  
58 effect deleterious mutations sometimes drift to higher frequencies even in small populations due to  
59 stochasticity in mating patterns and demography. For example, a single recessive allele causing a  
60 lethal form of dwarfism affects the Californian condor (*Gymnogyps californianus*) and segregates at  
61 a frequency of 9% (Ralls *et al.*, 2000). Similarly, in Scottish red-billed choughs (*Pyrrhocorax*  
62 *pyrrhocorax*), a recessive mutation causes blindness in 1-6% of nestlings (Trask *et al.*, 2016). Despite  
63 their potential importance, strongly deleterious recessive alleles are difficult to detect in wild  
64 populations, because they do not usually have an obvious phenotypic effect, are present at very low  
65 frequencies, or cause prenatal mortality.

66

67 Embryonic lethal mutations that prevent an individual from being born are arguably the earliest and  
68 most severe manifestation of inbreeding depression. They are likely to be relatively common, as loss  
69 of function mutations are lethal in around one third of mammalian genes, and most of these are  
70 probably lethal pre- rather than postnatally (Dickinson *et al.*, 2016; Georges *et al.*, 2019). In farm

71 animals, reverse genetic screens for depleted haplotype homozygosity have identified dozens of  
72 embryonic lethals (VanRaden *et al.*, 2011; Fritz *et al.*, 2013; Charlier *et al.*, 2016; Derks *et al.*, 2017;  
73 Jenko *et al.*, 2019). These can have substantial effects on the population as a whole, with around  
74 0.5% of embryos being affected by embryonic lethal mutations in cattle and pigs (Charlier *et al.*,  
75 2016; Derks *et al.*, 2019). While different methods exist to detect embryonic lethals and semi-lethals  
76 (mortality of some but not all embryos), the most reliable screens identify parents which are known  
77 carriers of a focal haplotype and test whether their living offspring are less often homozygous than  
78 expected. However, these screens need large sample sizes, dense genomic data, and genetic  
79 sampling immediately after birth to exclude postnatal lethality, which has so far largely prevented  
80 the detection of embryonic lethal mutations in wild populations.

81  
82 The Soay sheep of St. Kilda are descendants of early Bronze Age sheep which have roamed the  
83 Scottish St. Kilda archipelago freely and unmanaged for thousands of years. For nearly four decades,  
84 a part of the population in the Village Bay area of Hirta has been subject to a long-term study with  
85 genomic, phenotypic and life-history data collected for thousands of individuals, providing a unique  
86 opportunity to shed light on the impact of embryonic lethal mutations in the wild. Here, we scanned  
87 high-density SNP genotypes of nearly six thousand Soay sheep for embryonic lethal and semi-lethal  
88 haplotypes, explored whether their dynamics over the time are driven by selection or genetic drift  
89 and assessed their potential impact on postnatal fitness.

90

## 91 **Results**

92 We searched for haplotypes carrying putatively embryonic-lethal and semi-lethal mutations by  
93 screening for depleted haplotype homozygosity in a dataset of 5,925 wild Soay sheep with phased  
94 genotypes at 417k autosomal SNPs. Specifically, we identified pairs of parents each carrying at least  
95 one copy of a focal haplotype and assessed whether their offspring were less often homozygous for

96 that haplotype than expected. Initially, we tested haplotypes ranging in length from 100 to 500 SNPs  
97 (~700Kb to ~3,500Kb). The patterns of homozygous haplotype deficiency were qualitatively similar  
98 for different haplotype lengths (Supplementary Figure 1). We therefore subsequently focused on  
99 haplotypes with a length of 400 SNPs (~2,800Kb), as all genome-wide significant regions in this  
100 analysis were clearly present for all other haplotype lengths (Supplementary Figure 1).

101

102 Overall, no putatively fully lethal haplotype reached genome-wide significance, although one  
103 haplotype on chromosome 9 (6.64-8.74 Mb) was suggestive, with zero observed homozygotes  
104 despite 8.25 expected homozygote offspring from 33 carrier x carrier matings ( $\chi^2$  *p-value* = 0.0009,  
105 *df* = 1). We detected three semi-lethal haplotypes (Figure 1), from here on named SEL05 (**S**oay  
106 **E**mbryonic semi-**L**ethal Chr. 5; 37.2-39.8 Mb, carrier x carrier matings: *N* = 800, expected  
107 homozygotes: *N* = 258.50, observed homozygotes: *N* = 189,  $\chi^2$  *p-value* =  $1.49 \times 10^{-7}$ , *df* = 1, SEL07  
108 (Chr.7; 71.2-73.3 Mb, carrier x carrier matings: 382, exp.: 105.75, obs.: 58,  $\chi^2$  *p-value* =  $1.28 \times 10^{-8}$ ,  
109 *df* = 1) and SEL18 (Chr.18, 3.23-5.68 Mb, carrier x carrier matings: 815, exp.: 254.25, obs.: 176,  
110  $\chi^2$  *p-value* =  $3.29 \times 10^{-9}$ , *df* = 1), with 27%, 47% and 31% fewer homozygous offspring than  
111 expected, respectively (Supplementary Table 1). Assuming complete sampling of individuals in the  
112 study area, these three semi-lethal haplotypes have therefore potentially prevented around 199  
113 individuals from being born.

114

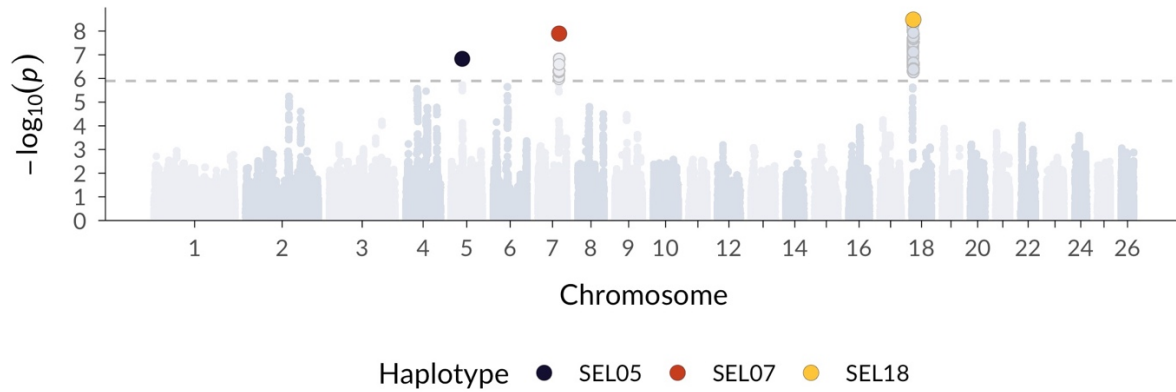

115

116 *Figure 1: Genome-scan for embryonic lethal haplotypes in Soay sheep. Shown are p-values for a homozygous*  
117 *haplotype deficiency test in the offspring of carrier x carrier matings, in 400-SNP haplotypes sliding one SNP at*  
118 *a time across the genome. The dotted line marks the genome-wide significance threshold.*

119

120 To better understand the short-term evolutionary dynamics of the semi-lethal haplotypes in the Soay  
121 sheep population since 1990, we performed gene-dropping simulations through the pedigree  
122 (Figure 2A). This approach allows us to evaluate whether the observed changes in haplotype  
123 frequency over time are consistent with expectations from genetic drift alone or whether selection  
124 could be contributing factor (MacCluer *et al.*, 1986; Gratten *et al.*, 2012; Johnston *et al.*, 2013). From  
125 1990 to 2018, SEL07 and SEL18 declined in frequency from 19% to 7% and from 32% to 18%,  
126 respectively (Figure 2A). The steep decline in frequency of SEL07 is unlikely to have occurred by drift  
127 alone, with only 7.4% of simulations resulting in steeper declines (Figure 2A, B). In contrast, there is  
128 little evidence for purifying selection in SEL18, as 22.1% of simulations showed steeper frequency  
129 declines, indicating that drift alone can frequently result in a decline of this magnitude (Figure 2A,  
130 B). Additionally, we explored the potential role of recombination in breaking down the haplotypes  
131 at rates that could have led to similar decreases, but found that gene-dropping simulations including  
132 recombination yielded qualitatively similar patterns (Supplementary Figure 2).

133

134 In contrast, the frequency of SEL05 did not decline and remained relatively stable over the last  
135 decades (from 20% in 1990 to 23% in 2018). This could be due to balancing selection, for example  
136 when the semi-lethal mutation is in linkage disequilibrium (LD) with an allele under positive selection.

137 To test this, we compared the cumulative frequency change seen in gene-drop simulations to the  
138 empirical data. Under balancing selection, we would expect the frequency change seen in drift-only  
139 gene-drop simulations to be larger than in the empirical data. Only 6.7% of simulations had a lower  
140 cumulative frequency change than observed empirically, suggesting that the relative stability in the  
141 frequency of SEL05 is unlikely under genetic drift alone (Figure 2C).

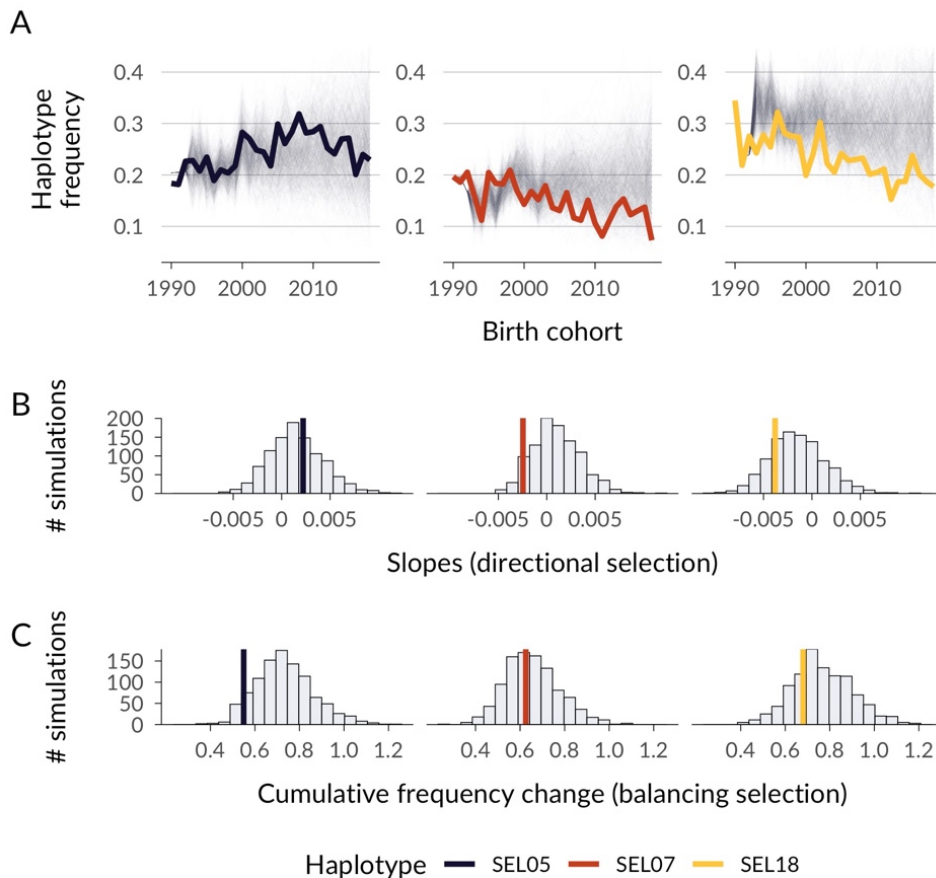

142  
143 *Figure 2: Empirical haplotype dynamics and gene-drop simulations for embryonic semi-lethal haplotypes in Soay*  
144 *sheep. Panel A shows the empirical haplotype frequencies per birth cohort from 1990 to 2018 as thick coloured*  
145 *lines and the results of 1,000 gene-drop simulations through the pedigree as thin grey lines. Gene-drop*  
146 *simulations represent possible frequency changes over time under genetic drift alone. Panel B compares linear*  
147 *model slopes of the empirical haplotype frequencies over time to simulated slopes as an indicator for directional*  
148 *selection. Panel C compares the cumulative frequency change of gene-drop simulations to the empirical*  
149 *haplotype frequency change as an indicator for balancing selection.*

150  
151 Finally, to explore whether embryonic semi-lethal haplotypes impact postnatal fitness, we estimated  
152 the effects of having one or two copies of each haplotype on first-year survival using Bayesian  
153 generalised linear mixed models. We fitted all three haplotypes simultaneously as predictors and

154 also included other phenotypic and environmental variables in the model (see Methods). Haplotype  
155 SEL18 had no effect on first-year survival, while SEL07 showed a tendency to decrease survival in  
156 heterozygote individuals, although credible intervals overlapped zero (Figure 4A, Supplementary  
157 Table 3), suggesting that deleterious effects of both haplotypes are largely expressed prenatally.  
158  
159 In contrast, SEL05 was associated with an increased first year survival when heterozygous (posterior  
160 mean log-odds estimate, 95% credible interval = 0.275, [0.015, 0.539], Supplementary Table 3). This  
161 translates into a predicted increase in survival probability of 6.58% (6.58, [0.350, 12.9], Figure 3A)  
162 when comparing individuals with one vs. no copy of SEL05 and when holding all other predictors  
163 constant at their mean and other haplotypes at their reference levels (0 copies). To examine a  
164 potential pathway for how SEL05 could increase survival, we fitted a model of August weight, a key  
165 fitness-related trait, with the same predictors as before. In line with higher survival, lambs with one  
166 copy of SEL05 were predicted to be 166 grams heavier (posterior mean estimate [95% credible  
167 interval] = 0.166 [0.043, 0.289]), and lambs with two copies were predicted to be 212 grams heavier  
168 (0.212, [-0.042, 0.466]), although credible intervals were wide due to a relatively small sample size  
169 for homozygous individuals (Figure 3B; see Supplementary Table 3 for all model estimates). In  
170 contrast there was no association between SEL07 or SEL18 and August weight.  
171



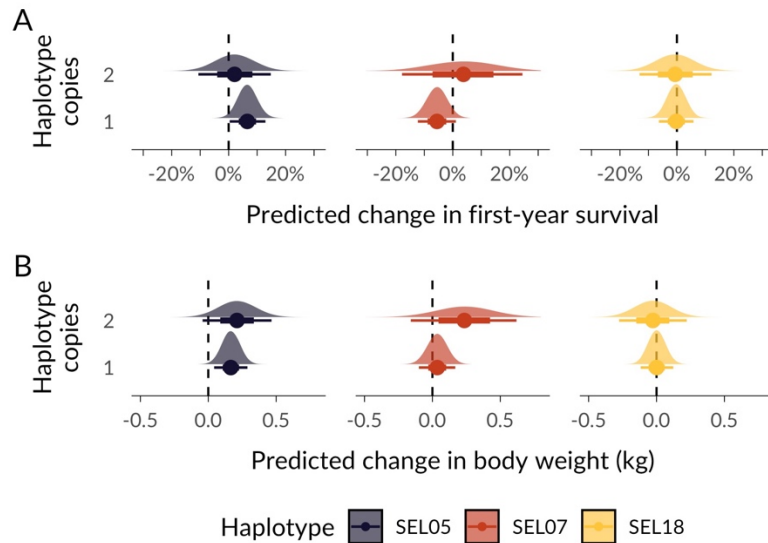

172

173 *Figure 3: GLMM predicted differences in (A) first-year survival and (B) lamb August body weight for individuals*  
174 *with one and two copies of each haplotype, compared to the reference level of having no copy of the focal*  
175 *haplotype. Fitted models included genotypes for all three haplotypes simultaneously. Half-eye plots show the*  
176 *posterior distribution plus the posterior mean as a point and the 66% and 95% credible intervals as thick and thin*  
177 *lines.*

178

## 179 **Discussion**

180 Detecting lethal and semi-lethal mutations in wild populations remains a major challenge, as they  
181 are rare and can be lethal even before birth. In this study, we identified three semi-lethal haplotypes  
182 linked to mortality in one third up to nearly half of homozygous embryos in a wild population of Soay  
183 sheep on the Scottish St. Kilda archipelago. Notably, homozygous haplotype carriers in the (living)  
184 population did not suffer from reduced survival, suggesting that the harmful effects are specific to  
185 embryo development. Over the last two decades, purifying selection is likely to have contributed to  
186 a reduction in the frequency of at least one of these haplotypes (SEL07) in the population. In contrast,  
187 the third semi-lethal haplotype (SEL05) is relatively stable over the recent past. Gene-drop  
188 simulations and an association with increased survival and body weight in lambs suggest that the  
189 haplotype frequency is partially maintained by balancing selection.

190

191 All three embryonic semi-lethal haplotypes were present at relatively high frequencies between 19%  
192 and 32% in the birth cohort of 1990. This is not surprising, as genetic drift is strong in the Soay  
193 population. The estimated  $N_e$  is only around 200 individuals (Kijas *et al.*, 2012), and the population  
194 experienced a recent bottleneck, where 85 sheep including 20 males were transferred from the  
195 island of Soay to the island of Hirta in 1934-5, founding the population which we now study (Clutton-  
196 Brock & Pemberton, 2004). Therefore, the founder event and demographic stochasticity after the  
197 bottleneck could have led to a rise in the frequency of strongly deleterious mutations. A third  
198 explanation for semi-lethal mutations at high frequencies is a possible admixture event around 150  
199 years ago with the now extinct Dunface breed, which could have introduced deleterious variation  
200 into the population (Feulner *et al.*, 2013). Finally, while the three detected haplotypes had relatively  
201 high frequencies, we expect this to be an ascertainment bias due to limited statistical power, where  
202 most semi-lethals and lethals remain undetected as they were simply too rare to reach genome-wide  
203 significance in our haplotype scan. Consequently, while strongly deleterious mutations are generally  
204 expected to be purged when  $N_e$  is small (Hedrick & Garcia-Dorado, 2016), their potential impact  
205 should not be ignored in real world populations, where demographic stochasticity and genetic drift  
206 can be high.

207

208 Over the last 25 years, the frequencies of the semi-lethal haplotypes SEL07 and SEL18 declined in  
209 the population, as would be expected if purifying selection is effective. However, in small  
210 populations, genetic drift can substantially change allele frequencies even in the absence of  
211 selection. Using gene-drop simulations based on the Soay sheep pedigree, we established a  
212 baseline expectation for haplotype frequency changes under drift alone. Only 7.4% of simulations  
213 showed steeper declines for SEL07 than observed empirically, suggesting that purifying selection  
214 may be contributing to the decline. Moreover, SEL07's frequency decreased by 12% in less than ten  
215 generations, which suggests that selection can be effective in reducing strongly deleterious variation  
216 within short, ecological timescales. The efficient selection against SEL07 in the Soay population is

217 consistent with theoretical (Hedrick & Garcia-Dorado, 2016) and empirical (Grossen *et al.*, 2020;  
218 Khan *et al.*, 2021; Stoffel *et al.*, 2021a) research showing that inbreeding depression in small  
219 populations is more likely to be a consequence of many weakly rather than fewer strongly  
220 deleterious alleles.

221  
222 Surprisingly, haplotype SEL05 had a relatively stable population frequency of around 20% over the  
223 last two decades despite its putative embryonic semi-lethality, and further analyses showed some  
224 support for balancing selection. Comparing SEL05 to drift-only gene-drop simulations, we showed  
225 that 93% of simulations had a higher cumulative frequency change than SEL05, making SEL05 more  
226 stable than expected in drift-only scenarios. Moreover, SEL05 was positively associated with  
227 postnatal fitness. Lambs which were heterozygous (but not homozygous) for SEL05 had a 6% higher  
228 predicted survival probability over their first winter. A second analysis of August body weight  
229 provided a potential pathway, as lambs with one or two copies of the haplotype were 166 and 212  
230 grams heavier when controlling for other predictors such as skeletal size (hindleg length) and  
231 inbreeding coefficient. There are several mechanistic explanations why SEL05 could be under  
232 balancing selection. One is antagonistic pleiotropy, where the same genetic variant has opposing  
233 effects on fitness, and which has been suggested as a widespread mechanism maintaining  
234 deleterious alleles (Carter & Nguyen, 2011). In farm animals for example, embryonic lethal mutations  
235 are maintained at high frequencies due to pleiotropic effects on milk yield in cows and growth in  
236 pigs (Kadri *et al.*, 2014; Derks *et al.*, 2018). Another explanation is linkage disequilibrium (LD)  
237 between the semi-lethal mutation and an allele under positive selection that increases body weight  
238 and survival. LD stretches over long distances in Soay sheep, with a half-decay around 600Kb (Stoffel  
239 *et al.*, 2021a), and analysing relatively long haplotypes makes it more likely to pick up antagonistic  
240 alleles too. To sum up, haplotype SEL05 was associated with both prenatal semi-lethality and higher  
241 postnatal weight and survival. Its frequency was also unusually stable over the last decades, all of  
242 which suggests that it is maintained by balancing selection.

243

244 Lastly, our study raises the question of how much embryonic lethal and semi-lethal alleles collectively  
245 contribute to inbreeding depression in natural populations. If homozygous carriers are absent or  
246 rare in the living population, the effects of embryonic lethal alleles will be largely neglected in  
247 estimates of inbreeding depression based on postnatal fitness. While some animals might be able  
248 buffer the fitness effects of lost embryos through re-mating, there could be a substantial population-  
249 wide impact, especially in small populations where carrier frequencies of specific mutations can be  
250 high. Currently, genome-wide scans for depleted homozygosity are not feasible in most wild  
251 populations due to the need for large sample sizes, extensive parentage information and dense  
252 genomic data. A promising avenue is a two-step approach, in which genome-sequence based  
253 predictions of loss-of-function mutations could limit the number of target regions, and thereby  
254 increase the power to detect depleted homozygosity and embryonic lethals. Overall, our study  
255 reveals the potential contribution of semi-lethal mutations to inbreeding depression and individual  
256 fitness and highlights balancing selection as a mechanism for the maintenance of harmful genetic  
257 variation in wild populations.

258

## 259 **Materials and Methods**

260 **Study population.** Soay sheep are descendants of primitive European domestic sheep and have  
261 lived unmanaged on the St. Kilda archipelago, Scotland, for thousands of years (Clutton-Brock &  
262 Pemberton, 2004). A part of the population in the Village Bay area on the island of Hirta (57°49'N, 8  
263 34'W) has been the focus of a long-term individual-based study since 1985 (Clutton-Brock &  
264 Pemberton, 2004). More than 95% of individuals in the study area are ear-tagged within a week after  
265 birth during the lambing season from March to May, and DNA was extracted from either blood  
266 samples or ear punches. In order to impute genotypes, we assembled a pedigree based on 431  
267 unlinked SNP markers from the Ovine SNP50 BeadChip using the R package Sequoia (Huisman,

268 2017). In the few cases where no SNP genotypes were available, we assigned parents either from  
269 field observations or microsatellite markers (Morrissey *et al.*, 2012). All animal work was carried out  
270 according to UK Home Office procedures and was licensed under the UK Animals (Scientific  
271 Procedures) Act of 1986 (Project License no. PP4825594).

272

273 **Fitness and phenotype data.** Routine mortality checks, in particular during peak mortality in  
274 February, usually find around 80% of deceased animals (Béréños *et al.*, 2016). Here, we analysed 1)  
275 'first year survival', where every individual was given a 1 if it survived from birth (March to May) to the  
276 30<sup>th</sup> April of the next year, and a 0 if it did not, with measures available for 5,925 individuals born  
277 from 1979 to 2018. We also used phenotypic measures for lamb body weight in kg (to the nearest  
278 0.1kg) and lamb hindleg size in mm (to the nearest mm), both of which are measured in lambs every  
279 August.

280

281 **Genotyping.** We genotyped a total of 7,700 Soay sheep on the Illumina Ovine SNP50 BeadChip  
282 resulting in 39,368 polymorphic SNPs after filtering for SNPs with minor allele frequency > 0.001,  
283 SNP locus genotyping success > 0.99 and individual genotyping success > 0.95. We then used the  
284 *check.marker* function in GenABEL version 1.8-0 (Aulchenko *et al.*, 2007) with the same thresholds,  
285 including identity by state with another individual < 0.9. We also genotyped 189 sheep on the Ovine  
286 Infinium HD SNP BeadChip, resulting in 430,702 polymorphic SNPs for 188 individuals, after  
287 removing monomorphic SNPs, and filtering for SNPs with SNP locus genotyping success > 0.99 and  
288 individual sheep with genotyping success > 0.95. These sheep were specifically selected to  
289 maximise the genetic diversity represented in the full population (for full details, see Johnston,  
290 Béréños, Slate, & Pemberton, 2016). All SNP positions were based on the Oar\_v3.1 sheep genome  
291 assembly (GenBank assembly ID GCA\_000298735.1 (Jiang *et al.*, 2014)).

292

293 **Genotype imputation and phasing.** The detailed genotype imputation methods are presented  
294 elsewhere (Stoffel *et al.*, 2021a). Briefly, we first merged the datasets from the 50K SNP chip and  
295 from the HD SNP chip with the function `--bmerge` in PLINK v1.90b6.12 (Purcell *et al.*, 2007), resulting  
296 in a dataset with 436,117 SNPs including 33,068 SNPs genotyped on both SNP chips. We then  
297 discarded SNPs on the X chromosome and focused on the 419,281 SNPs located on autosomes. To  
298 impute SNPs with genotypes missing in individuals genotyped at the lower SNP density, we used  
299 AlphasImpute v1.98 (Hickey *et al.*, 2012), which uses both genomic and pedigree information for  
300 phasing and subsequent imputation of missing genotypes. After imputation, we filtered SNPs with  
301 call rates below 95%. Overall, this resulted in a dataset with 7691 individuals, 417,373 SNPs and a  
302 mean genotyping rate per individual of 99.5% (range 94.8%-100%). We evaluated the accuracy of  
303 genotype imputation using 10-fold leave-one-out cross-validation. In each iteration, we randomly  
304 chose one individual genotyped on the high-density (HD) SNP chip, masked genotypes unique to  
305 the HD chip and imputed the masked genotypes. This allowed us to compare the imputed  
306 genotypes to the true genotypes and to evaluate the accuracy of the imputation. Overall, 99.3% of  
307 genotypes were imputed correctly. To conduct haplotype-based analyses, we phased the imputed  
308 SNP dataset using SHAPEIT4 (Delaneau *et al.*, 2019) using the Soay sheep linkage map (Johnston *et*  
309 *al.*, 2016) and default parameter values. To infer linkage map positions for imputed SNPs, we used  
310 interpolation by assuming a constant recombination rate in genomic regions between linkage  
311 mapped SNPs (Stoffel *et al.*, 2021b).

312

313 **Homozygous haplotype deficiency analyses.** We identified haplotypes with putatively recessive  
314 (semi-)lethal mutations by testing whether offspring of carrier x carrier matings were less often  
315 homozygous for a given haplotype than expected. Specifically, for a focal haplotype  $h$ , we first  
316 identified parent-offspring trios where both parents carried at least one copy of  $h$ . We then  
317 calculated the expected number of homozygous offspring with  $E_{hh} = \sum_{i=1}^n pq$  where  $n$  is the number  
318 of parent pairs,  $p$  is the transmission probability of haplotype  $h$  for the female and  $q$  is the

319 transmission probability of haplotype  $h$  for the male. Transmission probabilities are 0.5 if the  
320 individual is heterozygous and 1 if it is homozygous for  $h$ . Based on the observed number of  
321 homozygous individuals  $O_{hh}$  we then followed Jenko *et al.* (2019) and calculated a one way and one  
322 degree of freedom Chi square test statistic  $\chi^2 = (O_{hh} - E_{hh})^2 / E_{hh} + (O_{non-hh} - E_{non-hh})^2 / E_{non-hh}$  with  $non-$   
323  $hh$  being the number of offspring which is either heterozygous or contains two copies of alternative  
324 haplotypes. To scan the genome for haplotypes deficient in homozygotes we used overlapping  
325 windows with varying length (100-500 SNPs) sliding one SNP at a time across the autosomal  
326 genome. For example, for the haplotype length of 100 SNPs we started with a window ranging from  
327 SNP 1 on chromosome 1 to SNP 100 on chromosome 1, identified all existing haplotypes with  
328 frequencies above 0.1 % in the population in this window, and then conducted the test for each  
329 identified haplotype. In line with previous work on high-density SNPs in Soay sheep (Stoffel *et al.*,  
330 2021a) we used a genome-wide significance threshold of  $p < 1.28 * 10^{-6}$ , which is a Bonferroni  
331 corrected p-value based on the number of independent tests ( $n_{eff} = 39,184$ ) estimated using  
332 SimpleM (Gao *et al.*, 2008) which takes into account linkage disequilibrium between markers. The  
333 threshold is not statistically precise, because it is difficult to determine the exact independent  
334 number of tests for a haplotype-based sliding window analysis. Per genomic window there are  
335 usually more than two haplotypes, so we evaluate more tests per region compared to a biallelic SNP-  
336 based association study. However, haplotypes are not independent as they overlap substantially  
337 when sliding them over the genome SNP by SNP. The genome-wide significance threshold should  
338 therefore be interpreted cautiously. Finally, to explore the effects of haplotype length on detecting  
339 homozygosity deficiency, we re-ran the genome scan with haplotype lengths ranging from 100 to  
340 500 SNPs.

341

342 **Gene-drop analysis.** We tested whether haplotype frequency changes across time are in line with  
343 genetic drift in the Soay sheep pedigree or potentially the result of selection using gene-drop  
344 simulations in genedroppeR v0.1.0 (code available at <https://github.com/susjoh/genedroppeR>).

345 Each individual present in the Soay sheep pedigree was assigned to a cohort based on their birth  
346 year. All cohorts from 1990 onwards were included, as the proportion of individuals genotyped  
347 before this time was below 70%. Then, the proportion of individuals defined as “founders” in each  
348 cohort (i.e. both parents are unknown) were determined; visual observation indicated that  
349 proportion of founder individuals declined rapidly from 1990 to 1992; these three cohorts are  
350 hereafter defined as the “sampled” cohorts, with the cohorts from 1993 to 2018 defined as the  
351 “simulated” cohorts. A total of 1,000 gene-drop simulations were conducted as follows. For all  
352 founder individuals in the sampled cohorts, haplotypes were sampled with the probability of their  
353 observed frequency in the individual's cohort. For non-founder individuals in the sampled cohorts,  
354 a haplotype was sampled from each of its parents assuming Mendelian segregation ( $Pr = 0.5$ ); if one  
355 parent was missing, then a haplotype was sampled as for the founder individuals above. In the  
356 simulated cohorts, non-founder individuals sampled a haplotype from each parent assuming  
357 Mendelian segregation ( $Pr = 0.5$ ). The haplotype frequencies were then calculated within each  
358 cohort. Finally, for any founder individuals or those with a missing parent in the simulated cohorts,  
359 haplotype(s) were sampled based on the haplotype frequencies in the rest of the simulated cohort.  
360 This generated simulated genotypes for each individual in the pedigree, which could then be used  
361 to generate a null distribution of haplotype frequencies and their changes over time (i.e. as expected  
362 under genetic drift alone) across the simulated cohorts (from 1993 to 2018). Comparisons were  
363 made only using individuals with known genotypes to allow a direct comparison between observed  
364 and simulated data. Using these data, we examined two aspects of allele frequency change over  
365 time using cohort year as a linear variable:

366

367 1. Directional selection: For each simulation, we modelled the frequency change the focal haplotype  
368 over time using a linear regression. The probability of observing the true slope under drift was  
369 determined by comparing it to the distribution of simulated slopes from 1993 to 2018;

370



371 2. Balancing selection: For each simulation, we modelled the cumulative change of the focal  
372 haplotype (i.e. the sum of the differences between allele frequencies from year to year) using a linear  
373 regression. Here, we assume that alleles with lower cumulative change from 1993 to 2018 may be  
374 subject to balancing selection.

375

376 **Modelling.** We estimated the effects of semi-lethal haplotypes on postnatal traits using Bayesian  
377 generalised linear mixed models (GLMM) in brms v2.15.0 (Bürkner, 2017), a high-level R interface to  
378 Stan (Carpenter *et al.*, 2017). For all models, we used a normal prior with mean = 0 and standard  
379 deviation = 5 for population-level (fixed) effects and the default half Student-t prior for the standard  
380 deviation of group-level (random effects) parameters. We ran four MCMC chains with the NUTS  
381 sampler with 10,000 iterations each, a warmup of 5,000 iterations and no thinning. All chains were  
382 visually checked for convergence and the Gelman-Rubin criterion was < 1.1 for all predictors,  
383 indicating good convergence (Gelman & Rubin, 1992).

384

385 **Survival analysis.** In the first model, we estimated the effects of semi-lethal haplotypes on first-year  
386 survival using a binomial model with logit link. We fitted first-year survival as a response variable and  
387 genotype dosages for the three haplotypes as predictors, with values 0 = two copies of alternative  
388 haplotypes, 1 = one copy of the focal haplotype and 2 = homozygous for the focal haplotype. These  
389 genotypes were fitted as factors, so that the model estimates differences between the reference level  
390 (2 alternative haplotypes) and 1 or 2 copies of the focal haplotype, respectively. Specifically, we used  
391 the following model structure based on n = 2294 complete observations: using the following model:

392

393  $\Pr(\text{surv}_i = 1) = \text{logit}^{-1}(\beta_0 + \text{hap1}\beta_1 + \text{hap2}\beta_2 + \text{hap3}\beta_3 + \text{froh}\beta_4 + \text{sex}_i\beta_5 + \text{twin}_i\beta_6 +$   
394  $\text{hindleg\_length}\beta_7 + \alpha_k^{\text{birth year}} + \alpha_l^{\text{mother id}})$

395

396  $\alpha_k^{\text{birth year}} \sim N(0, \sigma_{\text{birth year}}^2), \quad \text{for } k = 1, \dots, 30$

397  $\alpha_l^{\text{mother id}} \sim N(0, \sigma_{\text{mother id}}^2), \quad \text{for } k = 1, \dots, 819$

398

399 The probability of survival for observation  $i$  ( $\Pr(\text{surv}_i = 1)$ ) was modelled with an intercept  $\beta_0$ , seven  
400 population level (fixed) effects, which estimate the effects of the three haplotypes, individual  
401 inbreeding coefficient  $F_{\text{ROH}}$  calculated as the sum of runs of homozygosity (ROH) > 1Mb divided by  
402 the autosomal genome size (see Stoffel *et al.*, 2021a for details), sex of the individual (female = 0,  
403 male = 1), whether it was a twin (no = 0, yes = 1), and an individual's skeletal size via its August  
404 hindleg length. The latter was fitted to control for variation in individuals due to when they are born  
405 in a given year, as smaller individuals that are born later have a smaller chance of surviving the winter.  
406 The model also included two group-level (random) intercept effects for birth year and maternal  
407 identity to model environmental variation across years and maternal effects, respectively. Both  $F_{\text{ROH}}$   
408 and hindleg length were standardized (z-transformed).

409

410 **Body weight analysis.** We estimated the effects of semi-lethal haplotypes on body weight (in kg) in  
411 lambs using a model with Gaussian error distribution. We fitted the model with the same fixed and  
412 random effects and transformations as above, with  $n = 2286$  complete observations:

413

$$414 \quad \text{body\_weight} = \beta_0 + \text{hap1}\beta_1 + \text{hap2}\beta_2 + \text{hap3}\beta_3 + \text{froh}\beta_4 + \text{sex}_i\beta_5 + \text{twin}_i\beta_6 + \text{hindleg\_length}\beta_7 \\ 415 \quad + \alpha_k^{\text{birth year}} + \alpha_l^{\text{mother id}}$$

416

$$417 \quad \alpha_k^{\text{birth year}} \sim N(0, \sigma_{\text{birth year}}^2), \quad \text{for } k = 1, \dots, 30$$

$$418 \quad \alpha_l^{\text{mother id}} \sim N(0, \sigma_{\text{mother id}}^2), \quad \text{for } k = 1, \dots, 819$$

419

## 420 **Acknowledgements**

421 We thank the National Trust for Scotland for permission to work on St. Kilda and QinetiQ, Eurest and  
422 Kilda Cruises for logistics and support. We thank Ian Stevenson and many volunteers who have  
423 helped with data collection and management and all those who have contributed to keeping the  
424 project going. SNP genotyping was conducted at the Wellcome Trust Clinical Research Facility  
425 Genetic Core. This work has made extensive use of the Edinburgh Compute and Data Facility  
426 (<http://www.ecdf.ed.ac.uk/>). We are grateful for discussions with with the Wild Evolution Group at  
427 the University of Edinburgh, Joel Pick, and especially Janez Jenko. The project was funded through  
428 an outgoing Postdoc fellowship from the German Science Foundation (DFG) awarded to MAS and  
429 a Leverhulme Grant (RPG-2019-072) awarded to JMP and SEJ. Field data collection has been

430 supported by NERC over many years, and most of the SNP genotyping was supported by an ERC  
431 Advanced Grant to JMP.

432

### 433 **Author contributions**

434 JMP and MAS designed the study. JGP is the main Soay sheep project fieldworker and collected  
435 samples and life history data. JMP has run the Soay sheep long-term study and organised the SNP  
436 genotyping. SEJ wrote the *genedroppeR* package and built the fundamental genomic database,  
437 including genotyping, quality control and linkage mapping. MAS conducted data analyses and  
438 drafted the manuscript. MAS, JEP and SEJ jointly contributed to concepts, ideas and revisions of the  
439 manuscript.

440

### 441 **Data and code accessibility**

442 All data underlying the analyses are publicly available on Zenodo (Stoffel *et al.*, 2021c). The  
443 analysis scripts are available on GitHub ([https://github.com/mastoffel/haplotype\\_homozygosity](https://github.com/mastoffel/haplotype_homozygosity)).

444

### 445 **Literature**

446 Aulchenko, Y.S., Ripke, S., Isaacs, A. & Van Duijn, C.M. (2007) GenABEL: an R library for genome-  
447 wide association analysis. *Bioinformatics*, **23**, 1294–1296.

448 Béréños, C., Ellis, P.A., Pilkington, J.G. & Pemberton, J.M. (2016) Genomic analysis reveals  
449 depression due to both individual and maternal inbreeding in a free-living mammal population.  
450 *Molecular ecology*, **25**, 3152–3168.

451 Bürkner, P.-C. (2017) brms: An R package for Bayesian multilevel models using Stan. *Journal of*  
452 *statistical software*, **80**, 1–28.

453 Carpenter, B., Gelman, A., Hoffman, M.D., Lee, D., Goodrich, B., Betancourt, M., *et al.* (2017) Stan:  
454 A probabilistic programming language. *Journal of statistical software*, **76**.

455 Carter, A.J. & Nguyen, A.Q. (2011) Antagonistic pleiotropy as a widespread mechanism for the  
456 maintenance of polymorphic disease alleles. *BMC Medical Genetics*, **12**, 160.

457 Charlesworth, D. & Willis, J.H. (2009) The genetics of inbreeding depression. *Nature Reviews*  
458 *Genetics*, **10**, 783–796.

459 Charlier, C., Li, W., Harland, C., Littlejohn, M., Coppieters, W., Creagh, F., *et al.* (2016) NGS-based  
460 reverse genetic screen for common embryonic lethal mutations compromising fertility in livestock.  
461 *Genome research*, **26**, 1333–1341.

462 Clutton-Brock, T.H. & Pemberton, J.M. (2004) *Soay sheep: dynamics and selection in an island*  
463 *population*. Cambridge University Press.

464 Delaneau, O., Zagury, J.-F., Robinson, M.R., Marchini, J.L. & Dermitzakis, E.T. (2019) Accurate,  
465 scalable and integrative haplotype estimation. *Nature Communications*, **10**, 5436.

466 Derks, M.F.L., Gjuvsland, A.B., Bosse, M., Lopes, M.S., Son, M. van, Harlizius, B., *et al.* (2019) Loss of  
467 function mutations in essential genes cause embryonic lethality in pigs. *PLOS Genetics*, **15**,  
468 e1008055.

469 Derks, M.F.L., Lopes, M.S., Bosse, M., Madsen, O., Dibbits, B., Harlizius, B., *et al.* (2018) Balancing  
470 selection on a recessive lethal deletion with pleiotropic effects on two neighboring genes in the  
471 porcine genome. *PLOS Genetics*, **14**, e1007661.

- 472 Derks, M.F.L., Megens, H.-J., Bosse, M., Lopes, M.S., Harlizius, B. & Groenen, M.A.M. (2017) A  
473 systematic survey to identify lethal recessive variation in highly managed pig populations. *BMC*  
474 *Genomics*, **18**, 858.
- 475 Dickinson, M.E., Flenniken, A.M., Ji, X., Teboul, L., Wong, M.D., White, J.K., *et al.* (2016) High-  
476 throughput discovery of novel developmental phenotypes. *Nature*, **537**, 508-514.
- 477 Feulner, P.G.D., Gratten, J., Kijas, J.W., Visscher, P.M., Pemberton, J.M. & Slate, J. (2013)  
478 Introgression and the fate of domesticated genes in a wild mammal population. *Molecular Ecology*,  
479 **22**, 4210-4221.
- 480 Fritz, S., Capitan, A., Djari, A., Rodriguez, S.C., Barbat, A., Baur, A., *et al.* (2013) Detection of  
481 haplotypes associated with prenatal death in dairy cattle and identification of deleterious  
482 mutations in GART, SHBG and SLC37A2. *PLoS One*, **8**, e65550.
- 483 Gao, X., Starmer, J. & Martin, E.R. (2008) A multiple testing correction method for genetic  
484 association studies using correlated single nucleotide polymorphisms. *Genetic Epidemiology: The*  
485 *Official Publication of the International Genetic Epidemiology Society*, **32**, 361-369.
- 486 Gelman, A. & Rubin, D.B. (1992) Inference from iterative simulation using multiple sequences.  
487 *Statistical science*, **7**, 457-472.
- 488 Georges, M., Charlier, C. & Hayes, B. (2019) Harnessing genomic information for livestock  
489 improvement. *Nature Reviews Genetics*, **20**, 135-156.
- 490 Gratten, J., Pilkington, J.G., Brown, E.A., Clutton-Brock, T.H., Pemberton, J.M. & Slate, J. (2012)  
491 Selection and microevolution of coat pattern are cryptic in a wild population of sheep. *Molecular*  
492 *Ecology*, **21**, 2977-2990.
- 493 Grossen, C., Guillaume, F., Keller, L.F. & Croll, D. (2020) Purging of highly deleterious mutations  
494 through severe bottlenecks in Alpine ibex. *Nature Communications*, **11**, 1-12.
- 495 Hedrick, P.W. & Garcia-Dorado, A. (2016) Understanding inbreeding depression, purging, and  
496 genetic rescue. *Trends in ecology & evolution*, **31**, 940-952.
- 497 Hickey, J.M., Kinghorn, B.P., Tier, B., Werf, J.H. van der & Cleveland, M.A. (2012) A phasing and  
498 imputation method for pedigreed populations that results in a single-stage genomic evaluation.  
499 *Genetics Selection Evolution*, **44**, 9.
- 500 Huisman, J. (2017) Pedigree reconstruction from SNP data: parentage assignment, sibship  
501 clustering and beyond. *Molecular ecology resources*, **17**, 1009-1024.
- 502 Jenko, J., McClure, M.C., Matthews, D., McClure, J., Johnsson, M., Gorjanc, G., *et al.* (2019)  
503 Analysis of a large dataset reveals haplotypes carrying putatively recessive lethal and semi-lethal  
504 alleles with pleiotropic effects on economically important traits in beef cattle. *Genetics Selection*  
505 *Evolution*, **51**, 9.
- 506 Jiang, Y., Xie, M., Chen, W., Talbot, R., Maddox, J.F., Faraut, T., *et al.* (2014) The sheep genome  
507 illuminates biology of the rumen and lipid metabolism. *Science*, **344**, 1168-1173.
- 508 Johnston, S.E., Bérénos, C., Slate, J. & Pemberton, J.M. (2016) Conserved Genetic Architecture  
509 Underlying Individual Recombination Rate Variation in a Wild Population of Soay Sheep (*Ovis*  
510 *aries*). *Genetics*, **203**, 583-598.
- 511 Johnston, S.E., Gratten, J., Berenos, C., Pilkington, J.G., Clutton-Brock, T.H., Pemberton, J.M., *et al.*  
512 (2013) Life history trade-offs at a single locus maintain sexually selected genetic variation. *Nature*,  
513 **502**, 93.
- 514 Kadri, N.K., Sahana, G., Charlier, C., Iso-Touru, T., Guldbandsen, B., Karim, L., *et al.* (2014) A 660-  
515 Kb deletion with antagonistic effects on fertility and milk production segregates at high frequency

516 in Nordic Red cattle: additional evidence for the common occurrence of balancing selection in  
517 livestock. *PLoS genetics*, **10**, e1004049.

518 Kardos, M., Taylor, H.R., Ellegren, H., Luikart, G. & Allendorf, F.W. (2016) Genomics advances the  
519 study of inbreeding depression in the wild. *Evolutionary applications*, **9**, 1205–1218.

520 Khan, A., Patel, K., Shukla, H., Viswanathan, A., Valk, T. van der, Borthakur, U., *et al.* (2021) Genomic  
521 evidence for inbreeding depression and purging of deleterious genetic variation in Indian tigers.  
522 *Proceedings of the National Academy of Sciences*, **118**.

523 Kijas, J.W., Lenstra, J.A., Hayes, B., Boitard, S., Neto, L.R.P., Cristobal, M.S., *et al.* (2012) Genome-  
524 Wide Analysis of the World's Sheep Breeds Reveals High Levels of Historic Mixture and Strong  
525 Recent Selection. *PLOS Biology*, **10**, e1001258.

526 MacCluer, J.W., VandeBerg, J.L., Read, B. & Ryder, O.A. (1986) Pedigree analysis by computer  
527 simulation. *Zoo Biology*, **5**, 147–160.

528 Morrissey, M.B., Parker, D.J., Korsten, P., Pemberton, J.M., Kruuk, L.E. & Wilson, A.J. (2012) The  
529 prediction of adaptive evolution: empirical application of the secondary theorem of selection and  
530 comparison to the breeder's equation. *Evolution: International Journal of Organic Evolution*, **66**,  
531 2399–2410.

532 Purcell, S., Neale, B., Todd-Brown, K., Thomas, L., Ferreira, M.A., Bender, D., *et al.* (2007) PLINK: a  
533 tool set for whole-genome association and population-based linkage analyses. *The American*  
534 *Journal of Human Genetics*, **81**, 559–575.

535 Ralls, K., Ballou, J.D., Rideout, B.A. & Frankham, R. (2000) Genetic management of  
536 chondrodystrophy in California condors. *Animal Conservation*, **3**, 145–153.

537 Stoffel, M.A., Johnston, S.E., Pilkington, J.G. & Pemberton, J.M. (2021a) Genetic architecture and  
538 lifetime dynamics of inbreeding depression in a wild mammal. *Nature Communications*, **12**, 2972.

539 Stoffel, M.A., Johnston, S.E., Pilkington, J.G. & Pemberton, J.M. (2021b) Mutation load decreases  
540 with haplotype age in wild Soay sheep. *Evolution Letters*, **5**, 187–195.

541 Stoffel, M.A., Johnston, S.E., Pilkington, J.G. & Pemberton, J.M. (2021c) Data for "Genetic  
542 architecture and lifetime dynamics of inbreeding depression in a wild mammal." *Zenodo*.

543 Trask, A.E., Bignal, E.M., McCracken, D.I., Monaghan, P., Piertney, S.B. & Reid, J.M. (2016) Evidence  
544 of the phenotypic expression of a lethal recessive allele under inbreeding in a wild population of  
545 conservation concern. *Journal of Animal Ecology*, **85**, 879–891.

546 VanRaden, P.M., Olson, K.M., Null, D.J. & Hutchison, J.L. (2011) Harmful recessive effects on fertility  
547 detected by absence of homozygous haplotypes. *Journal of Dairy Science*, **94**, 6153–6161.

548 Xue, Y., Prado-Martinez, J., Sudmant, P.H., Narasimhan, V., Ayub, Q., Szpak, M., *et al.* (2015)  
549 Mountain gorilla genomes reveal the impact of long-term population decline and inbreeding.  
550 *Science*, **348**, 242–245.

551
